# Supplementary material for: Translation and Cross-Cultural Adaptation of SATIS-Stroke for Use in Brazil: A Satisfaction Measure of Activities and Participation in Stroke Survivors
Source: Biomed Res Int. 2019 Feb 18;2019:8054640. doi: 10.1155/2019/8054640 (PMC6398040; doi:10.1155/2019/8054640)
Supplement: Supplementary Materials — Final Brazilian Portuguese version of SATIS-Stroke. [file 8054640.f1.pdf]

## SUPPLEMENTARY MATERIAL

Final Brazilian Portuguese version of SATIS-Stroke.

**SATIS-Stroke:** Satisfação de Atividade e Participação para Acidente Vascular Encefálico (Versão em português)

---

**Paciente:** \_\_\_\_\_ **Data:** \_\_\_\_\_

| Qual é o seu NÍVEL DE SATISFAÇÃO na realização das seguintes situações de vida? | Muito Insatisfeito | Insatisfeito | Muito Satisfeito | Satisfeito | ? |
|---------------------------------------------------------------------------------|--------------------|--------------|------------------|------------|---|
|---------------------------------------------------------------------------------|--------------------|--------------|------------------|------------|---|

|   |                                                                             |  |  |  |  |  |
|---|-----------------------------------------------------------------------------|--|--|--|--|--|
| 1 | Participar no preparo de alimentos e bebidas em todas as situações.         |  |  |  |  |  |
| 2 | Usar faca, garfo e colher em todas as situações.                            |  |  |  |  |  |
| 3 | Participar de conversas com seus amigos.                                    |  |  |  |  |  |
| 4 | Lavar seus cabelos de acordo com as suas necessidades.                      |  |  |  |  |  |
| 5 | Despir-se ou vestir-se para usar o vaso sanitário em sua casa ou fora dela. |  |  |  |  |  |
| 6 | Fazer a sua higiene pessoal de acordo com as suas necessidades.             |  |  |  |  |  |
| 7 | Em controlar sua urina em sua casa e fora dela.                             |  |  |  |  |  |
| 8 | Participar de eventos e locais de artes e culturas.                         |  |  |  |  |  |
| 9 | Ajudar outras pessoas.                                                      |  |  |  |  |  |

|    |                                                                                |  |  |  |  |  |
|----|--------------------------------------------------------------------------------|--|--|--|--|--|
| 10 | Ler e compreender um documento em todas as situações.                          |  |  |  |  |  |
| 11 | Usar o telefone em casa de acordo com suas necessidades.                       |  |  |  |  |  |
| 12 | Ouvir e assistir à televisão de acordo com suas necessidades.                  |  |  |  |  |  |
| 13 | Administrar seus rendimentos em todas as situações.                            |  |  |  |  |  |
| 14 | Usar moedas e notas de dinheiro em todas as situações.                         |  |  |  |  |  |
| 15 | Vestir-se e despir-se em todas as situações e de acordo com suas necessidades. |  |  |  |  |  |
| 16 | Garantir que seus direitos sejam respeitados.                                  |  |  |  |  |  |
| 17 | Participar de relações românticas e íntimas com seu parceiro(a).               |  |  |  |  |  |
| 18 | Tomar seu banho em seu chuveiro de acordo com suas necessidades.               |  |  |  |  |  |
| 19 | Alcançar objetos ao seu redor.                                                 |  |  |  |  |  |
| 20 | Tirar roupas do armário.                                                       |  |  |  |  |  |
| 21 | Preencher informações em documentos/formulários em todas as situações.         |  |  |  |  |  |
| 22 | Mover-se dentro de sua casa.                                                   |  |  |  |  |  |
| 23 | Mover-se para fora de sua casa em todas as situações.                          |  |  |  |  |  |
| 24 | Subir e descer todos os andares em sua casa de acordo com suas necessidades.   |  |  |  |  |  |
| 25 | Entrar e sair de sua casa de acordo com suas necessidades.                     |  |  |  |  |  |

|    |                                                                                                                          |  |  |  |  |  |
|----|--------------------------------------------------------------------------------------------------------------------------|--|--|--|--|--|
| 26 | Abrir e fechar as portas em sua casa.                                                                                    |  |  |  |  |  |
| 27 | Usar os espaços de sua casa para armazenar alimentos, bebidas, roupas e outros objetos necessários para o seu dia-a-dia. |  |  |  |  |  |
| 28 | Escolher roupas apropriadas de acordo com a ocasião.                                                                     |  |  |  |  |  |
| 29 | Compartilhar seus sentimentos.                                                                                           |  |  |  |  |  |
| 30 | Estar consciente com o que está ao seu redor.                                                                            |  |  |  |  |  |
| 31 | Expressar-se para alguém.                                                                                                |  |  |  |  |  |
| 32 | Participar de cerimônias (casamento, reunião de família, etc.).                                                          |  |  |  |  |  |
| 33 | Pedir ajuda em uma situação de emergência.                                                                               |  |  |  |  |  |
| 34 | Controlar suas dores em todas as situações.                                                                              |  |  |  |  |  |
| 35 | Manter-se em relacionamentos afetivos.                                                                                   |  |  |  |  |  |
| 36 | Ter um relacionamento sexual com seu parceiro(a).                                                                        |  |  |  |  |  |

### **Instruções para o questionário SATIS-Stroke**

#### **O questionário SATIS-Stroke**

O questionário SATIS-Stroke foi desenvolvido como uma medida de satisfação da atividade e participação percebida pelo paciente. Com o intuito de encontrar a satisfação das atividades e situações de vida mais específica. Alguns itens foram selecionados a partir de escalas. A primeira aplicação do questionário em uma amostra de pacientes com AVC mostrou que os itens definidos apontam uma escala de satisfação válida. O SATIS-Stroke foi desenvolvido originalmente usando o modelo de medição Rasch. Isto permite converter pontuações ordinais em medidas lineares localizadas em uma escala unidimensional.

## Procedimentos

O questionário SATIS-Stroke Brasil deve ser administrado sob forma de entrevista. Os pacientes são solicitados a estimar o nível de satisfação na realização de cada atividade e situação de vida, quando são feitas:

- No mês do preenchimento do questionário;
- Com outra ajuda técnica ou humana (mesmo que o paciente realmente use ajuda na vida diária);
- Qualquer que seja a estratégia usada (qualquer compensação é permitida).

Durante a avaliação, uma escala de resposta de 4 níveis é apresentada aos pacientes. Os pacientes são convidados a avaliar sua percepção na escala de respostas como "Muito insatisfeito", "Insatisfeito", "Satisfeito" ou "Muito satisfeito". Atividades não realizadas no último mês não são pontuadas e são inseridas como Não Aplicável (marque o ponto de interrogação). Para qualquer atividade as quatro respostas possíveis são:

- Muito insatisfeito: o paciente é incapaz de realizar a atividade sem usar qualquer outra ajuda;
- Insatisfeito: o paciente é capaz de realizar sozinho, mas com um pouco de ajuda;
- Satisfeito: o paciente consegue realizar a atividade sozinho, mas apresenta dificuldades
- Muito satisfeito: o paciente realiza a atividade sozinho, sem nenhuma dificuldade.
- Não Aplicável ou Ponto de interrogação: o paciente não pode estimar a satisfação da atividade porque ele nunca fez a atividade ou não a realizou no período de um mês.

Note que quando um paciente nunca tentou a atividade, o avaliador precisa ter certeza se o indivíduo nunca realizou. As instruções são dadas ao paciente apenas no início do teste. Cinco itens são usados para treinamento, a fim de ajudar o paciente a sentir cada nível da escala de classificação e usar toda a amplitude da escala de resposta. O examinador pode repetir as instruções sempre que o paciente mostrar alguma hesitação em responder.
